1 **Inducible TRAP RNA profiling reveals host genes expressed in**  
2 **Arabidopsis cells haustoriated by downy mildew**

3

4 **Shuta Asai<sup>1\*</sup>, Volkan Cevik<sup>2</sup>, Jonathan D.G. Jones<sup>3\*</sup> and Ken Shirasu<sup>1\*</sup>**

5

6 <sup>1</sup>Center for Sustainable Resource Science, RIKEN, 1-7-22 Suehiro-cho, Tsurumi, Yokohama,  
7 Kanagawa, 230-0045 Japan.

8 <sup>2</sup>The Milner Centre for Evolution, Department of Life Sciences, University of Bath, Bath  
9 BA2 7AY, United Kingdom.

10 <sup>3</sup>The Sainsbury Laboratory, Norwich Research Park, Norwich NR4 7UH, United Kingdom.

11

12

13 \*Authors for correspondence:

14 Shuta Asai

15 Email: [shuta.asai@riken.jp](mailto:shuta.asai@riken.jp)

16

17 Ken Shirasu

18 Email: [ken.shirasu@riken.jp](mailto:ken.shirasu@riken.jp)

19

20 Jonathan D.G. Jones

21 Email: [jonathan.jones@tsl.ac.uk](mailto:jonathan.jones@tsl.ac.uk)

22

23

24 **Running title:** The cellular Arabidopsis/downy mildew interaction

25 **Abstract**

26 The downy mildew oomycete *Hyaloperonospora arabidopsidis*, an obligate filamentous  
27 pathogen, infects Arabidopsis by forming feeding structures called haustoria inside host cells.  
28 Previous transcriptome analyses revealed host genes are specifically induced during  
29 infection; however, RNA profiling from infected tissues may fail to capture key  
30 transcriptional events occurring exclusively in haustoriated host cells where the pathogen  
31 injects virulence effectors to modulate host immunity. To determine interactions between  
32 Arabidopsis and *H. arabidopsidis* at the cellular level, we devised a new translating ribosome  
33 affinity purification system applicable to inducible, including pathogen-responsive, promoters  
34 thus enabling haustoriated cell-specific RNA profiling. Among the host genes specifically  
35 expressed in *H. arabidopsidis*-haustoriated cells, we found genes that promote either  
36 susceptibility or resistance to the pathogen, providing new insights into the  
37 Arabidopsis/downy mildew interaction. We propose that our novel protocol for profiling  
38 cell-specific transcripts will be applicable to several stimulus-specific contexts and other  
39 plant-pathogen interactions.

## 40 **Introduction**

41 *Hyaloperonospora arabidopsidis* causes downy mildew disease in the model plant  
42 *Arabidopsis*. *H. arabidopsidis* is an obligate biotrophic oomycete that completes its life cycle  
43 without killing the host. Asexual *H. arabidopsidis* conidiospores germinate and form  
44 appressoria to penetrate leaf surfaces. Hyphae then grow intercellularly, producing numerous  
45 pyriform-shaped structures called haustoria in mesophyll cells (Coates and Beynon, 2010).  
46 Haustoria impose invaginations of the plant cell, creating an interface between host and  
47 pathogen called an extra-haustorial matrix. This matrix is thought to be the site where the  
48 pathogen acquires nutrients from the plant and where pathogen-derived effectors are  
49 delivered into the host cell to suppress defense responses and promote susceptibility.

50 Host genes that promote susceptibility to pathogens are called susceptibility (*S*)  
51 genes (van Schie and Takken, 2014). *S* genes are generally expressed in infected cells to  
52 accommodate pathogens. In the *Arabidopsis*/downy mildew interaction, for example, the *S*  
53 gene *DMR6* (*Downy Mildew Resistant 6*) is exclusively induced in host cells containing  
54 haustoria (haustoriated cells) (Fig. 1A, van Damme et al., 2008). *DMR6* encodes a salicylic  
55 acid (SA) 5-hydroxylase that inactivates SA, a phytohormone essential for plant immunity  
56 (Zhang et al., 2017). Consistently, *H. arabidopsidis* specifically suppresses SA-inducible *PRI*  
57 (*PATHOGENESIS-RELATED GENE1*) expression in haustoriated cells, whereas *PRI* is  
58 expressed in the surrounding cells (non-haustoriated cells) (Fig. 1A, Caillaud et al., 2013;  
59 Asai et al., 2014). Several *H. arabidopsidis* effectors are able to suppress the SA signaling  
60 pathway (Caillaud et al., 2013; Asai et al., 2014; Wirthmueller et al., 2018); however, little is  
61 known about what events occur in the infected cells to modulate the local responses of  
62 *Arabidopsis* to *H. arabidopsidis*. Identifying these events requires cell-specific transcript  
63 analysis.

64 Translating ribosome affinity purification (TRAP) is a powerful method that enables  
65 cell type-specific RNA profiling (Mustroph et al., 2009b; Heiman et al., 2014). In the  
66 traditional TRAP system, ribosome-associated mRNAs are immunopurified from specific cell  
67 populations that express an epitope-tagged ribosomal protein via developmentally regulated  
68 promoters (i.e., cell type-specific promoters) (Fig. S1) (Mustroph et al., 2009b). A limitation  
69 of the traditional TRAP methodology makes the procedure inapplicable to cells in which  
70 stress-responsive promoters are activated because the newly synthesized epitope-tagged  
71 ribosomes must replace pre-existing ribosomes in the cells, i.e., a problem of ribosomal  
72 turnover. To overcome this limitation, an affinity tag, but not a ribosomal protein, should be  
73 controlled by the specific promoter to capture ribosomes with corresponding tags under the

74 control of their own or a constitutive promoters. Based on this concept, we established a  
75 novel TRAP system that relies on high affinity colicin E9-Im9-based interactions. Our new  
76 system allows the formation of tagged ribosomal complexes only in cells where the *DMR6*  
77 promoter is activated, thereby enabling haustoriated cell-specific RNA profiling. Among the  
78 haustoriated cell-specific transcripts, we found genes involved in resistance and susceptibility  
79 to *H. arabidopsidis*, indicating that haustoriated cell-specific RNA profiling can provide new  
80 insights into the interaction between Arabidopsis and the downy mildew pathogen.

81

## 82 **Results**

### 83 **A new TRAP system for cells with specific promoter activation**

84 Although *DMR6* and *PRI* show distinct cellular expression patterns in Arabidopsis infected  
85 with *H. arabidopsidis* (Fig. 1A; van Damme et al., 2008; Caillaud et al., 2013; Asai et al.,  
86 2014), transcriptome analysis using whole tissues revealed no significant difference in the  
87 expression patterns of these genes during infection (Fig. S2; Asai et al., 2014). To elucidate  
88 the interaction between Arabidopsis and *H. arabidopsidis* at the cellular level, we designed a  
89 new TRAP system using two high-affinity binding proteins: a bacterial toxin protein, E9, and  
90 its cognate immunity protein, Im9 (Li et al., 1997). The new TRAP system consists of two  
91 chimeric transgenes: one gene encodes RPL18 fused to Im9 driven by the *35S* promoter  
92 (*p35S*); the second gene is controlled by promoters of stress-responsive genes such as *DMR6*  
93 (*pDMR6*) or *PRI* (*pPRI*) and encodes E9 fused to a tandem 6xHis and 3xFLAG epitope tag  
94 (HF) used for purification (Fig. 1B). In cells where the corresponding promoters are active,  
95 the purification tag attaches to ribosomes when binding between E9 and Im9 occurs (Fig.  
96 1C).

97 We confirmed whether tagged ribosomes are formed by the binding of E9 and Im9  
98 using a *Nicotiana benthamiana* transient expression system. As expected, YFP-RPL18  
99 accumulated in the nucleolus, where most ribosome biogenesis events take place (Fig. 2).  
100 E9-GFP localized to the cytoplasm and nucleus, excluding the nucleolus, when coexpressed  
101 with GUS as a control, whereas GFP fluorescence was observed in the nucleolus when  
102 E9-GFP was coexpressed with Im9-RPL18 (Fig. 2). These results indicated that ribosomal  
103 complexes consisting of chimeric constructs were formed upon the binding of E9 and Im9.

104

### 105 **Validating the cell-specific TRAP system with *H. arabidopsidis*-infected Arabidopsis**

106 We created Arabidopsis transformants containing two transgenes: Im9-RPL18 controlled by  
107 *p35S* (*p35S::Im9-RPL18*) and E9-HF driven by either *pDMR6* (*pDMR6::E9-HF*), *pPRI*

108 (*pPRI::E9-HF*), or the *Actin2* promoter (*pAct2::E9-HF*) as a control (Fig. 1B). We  
109 hypothesized that E9-RPL18 would bind to Im9-HF in cells where both transgenes were  
110 expressed, thereby enabling conditional but efficient tagging of pre-existing ribosomes in the  
111 cells of interest (Fig. 1C). After inoculating the transformants with *H. arabidopsidis* virulent  
112 isolate Waco9, proteins derived from fractions containing ribosomes and mRNAs  
113 (polysome-enriched fractions, see Materials and methods) were extracted from infected  
114 tissues. The Im9-RPL18/E9-HF complexes were immunoprecipitated with anti-FLAG  
115 agarose beads, from which RNAs were extracted and referred to as RNAs\_IP (Fig. 3A). We  
116 also extracted RNAs directly from the polysome-enriched fractions and designated those as  
117 RNAs\_Total. To confirm whether E9-HF is properly controlled by *pDMR6* or *pPRI* in the  
118 transformants, immunoblots of protein samples after inoculation with *H. arabidopsidis* were  
119 probed with anti-FLAG antibodies. As expected, E9-HF was detected during *H.*  
120 *arabidopsidis* infection in transformants containing *pDMR6::E9-HF* or *pPRI::E9-HF*,  
121 whereas transformants containing *pAct2::E9-HF* constantly accumulated E9-HF (Fig. 3B).  
122 Importantly, RT-qPCR analysis confirmed that *DMR6* or *PRI* transcripts were enriched in the  
123 RNAs\_IP samples derived from transformants containing *pDMR6::E9-HF* or *pPRI::E9-HF*,  
124 respectively, whereas the transcript levels of *Act2* were comparable among the RNAs\_IP  
125 samples (Fig. 3C). In the RNAs\_Total samples, there was no difference in the transcript  
126 levels of either *DMR6*, *PRI* or *Act2* (Fig. 3C). These results indicated that the new TRAP  
127 system successfully enriched specific cell-derived mRNAs during *H. arabidopsidis* infection.

128

### 129 **Identifying *DMR6*-coexpressed genes during *H. arabidopsidis* infection**

130 To investigate cell-specific responses during *H. arabidopsidis* infection, the TRAP samples  
131 were subjected to RNA-seq analysis (Table S1). In the RNAs\_Total samples, there were no  
132 differentially expressed genes in the *pDMR6::E9-HF* or the *pPRI::E9-HF* transformants  
133 compared to the *pAct2::E9-HF* control (Fig. 4A). By contrast, the RNAs\_IP samples had  
134 genes with significant differences in expression levels (FDR = 0.05). The *pDMR6::E9-HF*  
135 transformants had 4,524 upregulated genes and 319 downregulated genes; whereas the  
136 *pPRI::E9-HF* transformants had 3,969 upregulated genes and 338 downregulated genes  
137 compared to the control (Fig. 4a and Table S2). Importantly, *DMR6* and *PRI* were among the  
138 upregulated genes of the *pDMR6::E9-HF* and *pPRI::E9-HF* transformants, respectively. To  
139 identify genes coexpressed with *DMR6* and are specifically expressed in cells infected by *H.*  
140 *arabidopsidis* (haustoriated cells), we compared the upregulated genes in the *pDMR6::E9-HF*  
141 transformants to those in the *pPRI::E9-HF* transformants. The comparison revealed 1,571

142 candidate genes coexpressed with *DMR6* but not *PR1* (Fig. 4B and Table S3). Candidate  
143 genes were further limited by a comparison with our previously reported list of genes whose  
144 expression was significantly upregulated during infection with *H. arabidopsidis* (Table S3;  
145 Asai et al., 2014). In this analysis, we identified *DMR6* and 53 genes that were designated  
146 *DMR6*-coexpressed genes (Table 1). Among these 54 genes, gene ontology (GO) analysis  
147 revealed an overrepresentation of genes related to disease resistance (e.g., GO:0050832 and  
148 GO:0006952) and genes responsive to oxygen levels (e.g., GO:0001666 and GO:0070482)  
149 and chemicals (e.g., GO:0042221) (Fig. S3).

150 In the *DMR6*-coexpressed gene list (Table 1), we found *PHYTOSULFOKINE 4*  
151 *PRECURSOR* (*PSK4*; *AT3G49780*) and *WRKY18* (*AT4G31800*), genes known to function as  
152 negative regulators of plant immunity. Arabidopsis transformants containing the *PSK4* or  
153 *WRKY18* promoter controlling the *GUS* reporter gene were generated and inoculated with *H.*  
154 *arabidopsidis* to confirm that *PSK4* and *WRKY18* are expressed in haustoriated cells. In both  
155 transformants, *GUS* staining was restricted to haustoriated cells as observed for *H.*  
156 *arabidopsidis*-infected *pDMR6::GUS* lines (Fig. 5). This result indicated that *PSK4* and  
157 *WRKY18* are expressed specifically in the cells haustoriated with *H. arabidopsidis*. These  
158 data also suggest that genes involved in plant immunity can be identified using the new  
159 TRAP system. Next, we randomly chose the following five genes from among the  
160 *DMR6*-coexpressed candidate genes (Table 1) for promoter-fused *GUS* analysis: *AZELAIC*  
161 *ACID INDUCED 3* (*AZI3*; *AT4G12490*), *KUNITZ TRYPSIN INHIBITOR 4* (*KTI4*;  
162 *AT1G73260*), *AT1G09932* (annotated to encode a phosphoglycerate mutase family protein),  
163 *PLANT CADMIUM RESISTANCE 2* (*PCR2*; *AT1G14870*), and *GERMIN-LIKE PROTEIN 9*  
164 (*GLP9*; *AT4G14630*). As expected, *GUS* staining was observed specifically in *H.*  
165 *arabidopsidis*-haustoriated cells in all transformants tested and in the *pDMR6::GUS* control  
166 (Fig. 5), indicating that these five genes are also coexpressed with *DMR6*.

167

### 168 **Identifying host genes whose overexpression confers resistance to downy mildew**

169 To assess whether these five genes are involved in the Arabidopsis-*H. arabidopsidis*  
170 interaction, we created Arabidopsis transformants overexpressing each gene. Two  
171 independent lines for each gene were selected. All individuals were morphologically similar  
172 to Col-0 wild-type (WT) plants (Fig. S4). At 5 d after inoculation with *H. arabidopsidis*,  
173 resistance levels of the transformants were assessed by counting the number of conidiospores  
174 formed on the plants and comparing them with Col-0 WT (Fig. 6). The most significantly  
175 resistant phenotypes were observed in *AZI3*-overexpressing lines that reproducibly had fewer

176 than 15% of the conidiospores formed on Col-0 WT. The other resistant lines were *KTI4*  
177 overexpressors that had fewer than one-half of the conidiospores formed on Col-0 WT. Plants  
178 overexpressing *ATIG09932* appeared to have slightly increased resistance to *H.*  
179 *arabidopsisidis*. In contrast, *PCR2*-overexpressing and *GLP9*-overexpressing lines showed no  
180 difference in resistance compared to Col-0 WT. Notably, none of the tested transformants  
181 differed from Col-0 WT in their resistance to the bacterial pathogen *Pseudomonas syringae*  
182 pv. *tomato* (*Pto*) DC3000 (Fig. 6), suggesting that at least the *AZI3*- and *KTI4*-overexpressing  
183 lines are specifically resistant to *H. arabidopsisidis*. To investigate the effect of *azi3* loss on  
184 disease resistance, we searched for the available T-DNA mutants but did not find any  
185 insertions in *AZI3*; however, we did find a line with T-DNA inserted in the promoter region of  
186 *KTI4* (SALK\_131716C, refer to *kti4.1*), leading to reduced *KTI4* expression (Arnaiz et al.,  
187 2018). No significant differences in disease resistance to *H. arabidopsisidis* were observed for  
188 *kti4.1* compared to Col-0 WT (Fig. S6).

189

## 190 **Discussion**

191 RNA profiling is a powerful method for determining the molecular basis of host-pathogen  
192 interactions, but analyses using whole tissues lead to responses from a variety of cell types,  
193 including infected- and non-infected cells. Here, we present an infected cell-specific RNA  
194 profiling strategy during the Arabidopsis/downy mildew interaction by employing a new  
195 TRAP system using the E9-Im9 pair. Our study found genes that are specifically expressed in  
196 cells haustoriated by *H. arabidopsisidis*. For example, this method detected *PSK4* and  
197 *WRKY18* that are specifically expressed in haustoriated cells. Furthermore, overexpression of  
198 *AZI3* and *KTI4*, two genes found to be specifically expressed in haustoriated cells, conferred  
199 resistance to *H. arabidopsisidis* but not to *Pto* DC3000.

200 Recently, a conceptually similar methodology using split GFPs was reported  
201 (Dinkeloo et al., 2022). Like ours, their method employed the *DMR6* promoter to drive the  
202 expression of a GFP fragment with a purification tag and another GFP fragment with a  
203 ribosome binding site, enabling the capture of polysomes from infected cells. Unfortunately,  
204 the report did not provide a list of genes detected by this method, making it impossible to  
205 compare with our dataset. One notable strategic difference is that we also used the *PRI*  
206 promoter, which is active in neighboring cells but not in haustoriated cells (Caillaud et al.,  
207 2013), to remove genes expressed in both cell types. This strategy provided an essential step  
208 as 2,953 out of 4,524 genes (65%) that *pDMR6::E9-HF* captured were also found by  
209 *pPRI::E9-HF* (Fig. 4B). Furthermore, 54 out of 1,571 (3.4%) genes were selected as induced

210 at 5 dpi with *H. arabidopsidis* to eliminate genes expressed in haustoriated cells but not  
211 responsive to the pathogen (Fig. 4B). Finally, histochemical GUS analysis confirmed that at  
212 least 7 genes were specifically expressed in the haustoriated cells (Fig. 5). These results  
213 strongly support that our RNA profiling of the cells of interest was successful.

214 Among the 7 genes, we found *PSK4* and *WRKY18* that are known to be involved in  
215 the modulation of plant immunity. Overexpression of *PSK4* and application of its active  
216 5-amino-acid bisulfated phytosulfokine (PSK) peptide inhibit pattern-triggered immunity  
217 (PTI) responses and increase the susceptibility to pathogens (Igarashi et al., 2012; Mosher et  
218 al., 2013). Similarly, *WRKY18* is redundant with *WRKY40* and negatively regulates the  
219 expression of PTI-responsive genes and resistance toward *Pto* DC3000 and the powdery  
220 mildew fungus *Golovinomyces orontii* (Xu et al., 2006; Pandey et al., 2010; Birkenbihl et al.,  
221 2017). As *PSK4* and *WRKY18* are specifically induced in haustoriated cells, these genes can  
222 be considered as *S* genes that help pathogen infection, similar to *DMR6*. A previous  
223 chromatin immunoprecipitation sequencing (ChIP-seq) analysis reported 1,403 genes as  
224 WRKY18 target genes (Birkenbihl et al., 2017). In our experiments, 9 out of the 54 genes  
225 (17%), including *DMR6* and the 53 *DMR6*-coexpressed genes, were identified (Table 1) as  
226 targets of WRKY18 (Table S4). Thus, WRKY18 may play a key role as a transcriptional hub  
227 for the *S* genes network. Since many *H. arabidopsidis* effectors are known to localize into  
228 plant cell nuclei when expressed *in planta* (Caillaud et al., 2012), targeting such hubs can be  
229 a suitable strategy for establishing infections as a biotroph.

230 In this study, we also identified *AZI3* as a transcriptionally induced gene in  
231 haustoriated cells whose overexpression conferred resistance to *H. arabidopsidis*. *AZI3*  
232 (*AT4G12490*) is a close paralog of the lipid transfer proteins *AZII* (*AT4G12470*) and *AZI4*  
233 (*AT4G12500*). These three genes have another paralog, *EARLY ARABIDOPSIS ALUMINUM*  
234 *INDUCED 1* (*EARLII*; *AT4G12480*); all four genes are tandemly located on chromosome 4  
235 in Arabidopsis (Cecchini et al., 2015), and all four genes are induced upon *H. arabidopsidis*  
236 infection (Asai et al., 2014). In particular, *EARLII* is included among the 53  
237 *DMR6*-coexpressed genes (Table 1), whereas *AZII* and *AZI4* are not included but appear to  
238 be coexpressed with *DMR6* (Fig. S5). Among the four paralogs, *AZII* and *EARLII* are  
239 reportedly key factors in establishing systemic acquired resistance (SAR) by affecting the  
240 lipid derivative azelaic acid (AZA) mobilization from local tissues to distal sites (Jung et al.,  
241 2009; Cecchini et al., 2015). *AZII*, *AZI3*, and *EARLII* all localize in the endoplasmic  
242 reticulum (ER)/plasmodesmata, chloroplast outer envelopes, and membrane-contact sites  
243 between these organelles (Cecchini et al., 2015). Since AZA is produced in chloroplasts



244 (Zoeller et al., 2012), *AZII* and its paralogs are thought to form part of the complexes  
245 contacting both chloroplasts and ER membranes, potentially allowing the non-vesicular  
246 transport of AZA to distal tissues (Cecchini et al., 2015). In this scenario, Arabidopsis may  
247 induce SAR signaling to counter secondary infection by expressing *AZII* and its paralogs in  
248 the *H. arabidopsidis*-infected cells. Consistent with this hypothesis, *AZI3* overexpressing  
249 lines exhibited enhanced resistance to *H. arabidopsidis* (Fig. 6). Interestingly, the *AZI3*-based  
250 enhanced resistance is *H. arabidopsidis* specific as *AZI3* overexpressors showed no  
251 difference in bacterial growth on local leaves after inoculation with *Pto* DC3000, a finding  
252 consistent with the results in *AZII* overexpressing lines reported by Wang et al. (2016). The  
253 effect of *azi3* loss on disease resistance was not investigated since the corresponding T-DNA  
254 mutants were unavailable. As SAR is reduced in the *azi1* and *earl1* mutants (Jung et al.,  
255 2009; Cecchini et al., 2015), it should be instructive to determine the effect of the quadruple  
256 mutation of *AZII* and its paralogs on plant immunity.

257 *KTI4*, a gene that encodes a functional Kunitz trypsin inhibitor (Li et al., 2008), is  
258 another gene identified in our study. The observation that *KTI4* overexpressors exhibit higher  
259 resistance to *H. arabidopsidis* (Fig 6) is markedly different from the findings of a previous  
260 study that reported overexpression of *KTI4* leads to higher susceptibility to the bacterial  
261 necrotroph *Pectobacterium carotovorum* (formerly *Erwinia carotovora*) (Li et al., 2008). The  
262 opposite resistance phenotypes against these pathogens might be due to a difference in  
263 lifestyle between biotrophs and necrotrophs. As SA signaling functions oppositely in  
264 biotrophs and necrotrophs (Hou and Tsuda, 2022) and *KTI4* is induced by SA (Li et al., 2008),  
265 *KTI4* may be involved in SA signaling. The expression of *DMR6* inactivates SA in *H.*  
266 *arabidopsidis*-haustoriated cells and may suppress plant immunity activated by *KTI4*,  
267 resulting in infection. *KTI4* overexpressing lines did not show increased resistance to *Pto*  
268 DC3000 (Fig. 6) or have any effect on plant growth (Fig. S4), suggesting that *KTI4*-mediated  
269 immunity is not constantly activated. The *kti4.1* mutant showed no difference in resistance to  
270 *H. arabidopsidis* compared to Col-0 WT (Fig. S6), possibly because of redundancy, as there  
271 are six paralogs of *KTI4* in Arabidopsis (Arnaiz et al., 2018). In fact, the closest paralog *KTI5*  
272 (*At1G17860*) seems to be coexpressed with *DMR6* (Fig. S7), although the paralog was not  
273 included in the list of 53 *DMR6*-coexpressed genes (Table 1). Further analysis is needed to  
274 determine how *KTI4* may be involved in resistance to *H. arabidopsidis*.

275 Our new TRAP system revealed host genes induced in the *H. arabidopsidis*-infected  
276 cells that function either in susceptibility or resistance. We hypothesize that different  
277 mechanisms induce the expression of these genes. For instance, susceptibility-related genes

278 may be induced by *H. arabidopsidis*, perhaps by using its effectors. In contrast, Arabidopsis  
279 may actively induce resistance-related genes by recognizing pathogen-derived molecules.  
280 Further genetic analysis is needed to dissect the signaling pathways. In addition, we expect  
281 that this E9-Im9 based TRAP system could be applicable to several other stimulus-specific  
282 contexts and other plant-pathogen interactions using relevant specific promoters.

283

## 284 **Materials and methods**

### 285 **Plant material and growth**

286 Arabidopsis plants were grown at 22 °C with a 10-h photoperiod and a 14-h dark period in  
287 environmentally controlled growth cabinets. *N. benthamiana* plants were grown at 25 °C with  
288 a 16-h photoperiod and an 8-h dark period in environmentally controlled growth cabinets.

289

### 290 **Pathogen assays**

291 Inoculation with the *H. arabidopsidis* Waco9 isolate was conducted as described by Asai et al.  
292 (2015). Briefly, Arabidopsis plants were spray-inoculated to saturation with a spore  
293 suspension of  $1 \times 10^4$  conidiospores/mL. Five replicates of three plants for each Arabidopsis  
294 line were used in the assays. Plants were covered with a transparent lid to maintain high  
295 humidity (90-100%) conditions in a growth cabinet at 16 °C with a 10-h photoperiod until the  
296 day of sampling. Conidiospores were harvested in 1 mL of water. After vortexing, the number  
297 of released conidiospores was determined using a hemocytometer. *P. syringae* pv. *tomato*  
298 DC3000 was grown on LB media containing 100 µg/mL rifampicin at 28 °C. Five- to  
299 six-week-old soil-grown plants were syringe-infiltrated with a bacterial suspension of  $5 \times 10^5$   
300 cfu/mL in 10 mM MgCl<sub>2</sub>. Bacterial growth in plants was monitored at 3 d post inoculation.

301

### 302 **Plasmid construction**

303 For the construction of the TRAP plasmids, the ORF of *RPL18* together with 3' UTR  
304 and the terminator was amplified from Col-0 gDNA for Golden Gate assembly (Engler et al.  
305 2008 PLOS One; Engler et al. 2014 ACS Synth Biol) into the pICH47751 vector with the 35S  
306 promoter and *Im9* (with GS spacer) as an N-terminal fusion tag. The 2,486 bp *DMR6*, 2,378  
307 bp *PRI*, and 1,450 bp *Act2* promoters were amplified from Col-0 gDNA for Golden Gate  
308 assembly (Engler et al. 2008 PLOS One; Engler et al. 2014 ACS Synth Biol) into the  
309 pICH47761 vector with *E9*, *HF* as a C-terminal fusion tag and *OCS* terminator. For the final  
310 Golden Gate assembly, *p35S::Im9-RPL18* (pICH47751) was combined with  
311 *pDMR6/pPRI/pAct2::E9-HF* (pICH47761), the herbicide BASTA resistance gene (*BAR*;

312 pICH47732) and *FastRed* (pICH47742) into the Level 2 Golden Gate vector pAGM4723.

313 For the transient expression studies, the ORF of *RPL18* was amplified from Col-0  
314 cDNA for Golden Gate assembly (Engler et al. 2008 PLOS One; Engler et al. 2014 ACS  
315 Synth Biol) into the binary vector pICH86988 with *Im9* or *YFP* as an N-terminal fusion tag.  
316 *E9* fused to *GFP* as a C-terminal fusion tag was also cloned into the pICH86988 vector.

317 For GUS reporter constructs, the promoter sequence plus 27 bp or 30 bp upstream  
318 from the start codon of *PSK4* (1,827 bp), *WRKY18* (2,030 bp), *AT1G09932* (1,062 bp), *PCR2*  
319 (2,030 bp), *KTI4* (993 bp), *AZI3* (2,030 bp) and *GLP9* (2,030 bp) was amplified from Col-0  
320 gDNA for Golden Gate assembly (Engler et al. 2008 PLOS One; Engler et al. 2014 ACS  
321 Synth Biol) into the binary vector pICSL86955 with the *GUS* reporter gene and *OCS*  
322 terminator.

323 For overexpressing constructs, the ORFs of *AT1G09932*, *PCR2*, *KTI4*, *AZI3*, and  
324 *GLP9* were amplified from Col-0 gDNA for Golden Gate assembly (Engler et al., 2008;  
325 Engler et al., 2014) into the binary vector pICSL86977 with a C-terminal *HF* fusion tag.

326

### 327 **Transient gene expression and plant transformation**

328 For transient gene expression analysis, *Agrobacterium tumefaciens* strain AGL1 was  
329 used to deliver the respective transgenes to *N. benthamiana* leaves using methods previously  
330 described (Asai et al., 2008). All bacterial suspensions carrying individual constructs were  
331 adjusted to an  $OD_{600} = 0.5$  in the final mix for infiltration, except for the coexpression of  
332 *35S::E9-GFP* with *35S::Im9-RPL18* in which bacterial suspensions were adjusted to  $OD_{600} =$   
333  $0.25$  for *35S::E9-GFP* and  $OD_{600} = 0.5$  for *35S::Im9-RPL18* due to low expression levels of  
334 *Im9-RPL18*. We hypothesize that the turnover of *RPL18* occurs more rapidly than for  
335 *E9-GFP*.

336 For plant transformation, Arabidopsis Col-0 plants were transformed using the  
337 dipping method (Clough and Bent, 1998). Briefly, flowering Arabidopsis plants were dipped  
338 into a solution containing *A. tumefaciens* carrying a plasmid of interest, and the seeds were  
339 harvested to select the T1 transformants on selective MS media. T1 plants were checked for  
340 expression of the construct-of-interest by immunoblot analysis. T2 seeds were sown on  
341 selective MS media, and the proportion of resistant versus susceptible plants was measured to  
342 identify lines with single T-DNA insertions. Transformed plants were transferred to soil, and  
343 the seeds were collected. Two independent T3 homozygous lines were analyzed.

344

### 345 **Confocal microscopy**

346 For *in planta* subcellular localization analysis in *N. benthamiana*, cut leaf patches were  
347 mounted in water and analyzed using a Leica TCS SP8 X confocal microscope (Leica  
348 Microsystems) with the following excitation wavelengths: GFP, 488 nm; YFP, 513 nm.

349

#### 350 **Protein extraction and immunoblotting**

351 Leaves were ground to a fine powder in liquid nitrogen and thawed in extraction buffer (50  
352 mM Tris-HCl, pH 7.5, 150 mM NaCl, 10% (v/v) glycerol, 10 mM DTT, 10 mM EDTA, 1  
353 mM NaF, 1 mM Na<sub>2</sub>MoO<sub>4</sub>·2H<sub>2</sub>O, 1% (v/v) IGEPAL CA-630 from Sigma-Aldrich and 1%  
354 (v/v) protease inhibitor cocktail from Sigma-Aldrich). Samples were cleared by  
355 centrifugation at 16,000 g for 15 min at 4 °C, and the supernatant liquid was collected and  
356 subjected to SDS-PAGE. Proteins were then electroblotted onto a PVDF membrane using a  
357 semidry blotter (Trans-Blot Turbo Transfer System; Bio-Rad). Membranes were blocked  
358 overnight at 4 °C in TBS-T (50 mM Tris-HCl, pH 7.5, 150 mM NaCl, and 0.05% (v/v) Tween  
359 20) with 5% (w/v) skim milk. Membranes were then incubated with horseradish  
360 peroxidase-conjugated anti-FLAG antibody (1:20,000; A8592; Sigma-Aldrich) diluted with  
361 TBS-T with 5% (w/v) skim milk at room temperature for 1 h. After washing with TBS-T,  
362 bound antibodies were visualized using SuperSignal West Femto Maximum Sensitivity  
363 Substrate (Thermo Fisher Scientific). Bands were imaged using an image analyzer  
364 (ImageQuant LAS 4000 imager; GE Healthcare).

365

#### 366 **Translating ribosome affinity purification (TRAP)**

367 TRAP was performed according to the method of Mustroph et al. (2009a) with the following  
368 modifications: 8 mL of polysome extraction buffer (PEB) was added to 81 samples of  
369 3-week-old plant-derived tissues that were ground in liquid nitrogen. The resulting extract  
370 was clarified twice by centrifugation at 16,000 g for 15 min at 4 °C, with a Miracloth  
371 filtration step between centrifugations. From a portion of the clarified extract, RNA was  
372 extracted and referred to as RNAs\_Total. The remainder of the extract was mixed with 150  
373 µL washed α-FLAG agarose beads (A2220, Sigma) and adjusted to 5 mL with PEB. The  
374 extract was incubated with the beads for 2 h with gentle rocking at 4 °C. The beads were  
375 washed as follows: one wash with 6 mL PEB and four washes with 6 mL wash buffer. The  
376 washed beads were resuspended in 300 µL wash buffer containing 300 ng/µL of 3xFLAG  
377 peptide (F4799, Sigma) and 20 U/mL RNAsin (Promega) and incubated for 30 min with  
378 gentle rocking at 4 °C. RNA was extracted from the supernatant liquid collected after  
379 centrifugation and is referred to as RNAs\_IP.

380

### 381 **RNA extraction, cDNA synthesis, and RT-qPCR**

382 Total RNAs were extracted using RNeasy Plant Mini Kit (Qiagen) according to the  
383 manufacturer's procedure. Total RNAs (1 µg) were used for generating cDNAs in a 20 µL  
384 reaction according to the Invitrogen Superscript III Reverse Transcriptase protocol. The  
385 obtained cDNAs were diluted five times, and 1 µL was used for a 10 µL qPCR reaction.  
386 qPCR was performed in a 10 µL final volume using 5 µL SYBR Green Mix (Toyobo), 1 µL  
387 diluted cDNAs, and primers. qPCR was run on Mx3000P qPCR System (Agilent) using the  
388 following program: (1) 95 °C, 3 min; (2) [95 °C, 30 sec, then 60 °C, 30 sec, then 72 °C, 30  
389 sec] x 45, (3) 95 °C, 1 min followed by a temperature gradient from 55 °C to 95 °C. The  
390 relative expression values were determined using the comparative cycle threshold method  
391 ( $2^{-\Delta\Delta C_t}$ ). *EF-1α* was used as the reference gene. Primers used for qPCR are listed in  
392 Supplementary Table S4.

393

### 394 **RNA sequencing**

395 The library prepared for RNA sequencing was constructed as described previously (Rallapalli  
396 et al., 2014). Purified double-stranded cDNAs were subjected to Covaris shearing  
397 (parameters: intensity, 5; duty cycle, 20%; cycles/burst, 200; duration, 60 sec). The libraries  
398 were sequenced on an Illumina NextSeq 500 DNA sequencer. Sequence data have been  
399 deposited in NCBI's Gene Expression Omnibus (GEO) and are accessible through GEO  
400 Series accession number GSE220449. The Illumina sequence library was quality-filtered  
401 using FASTX Toolkit version 0.0.13.2 (Hannonlab) with parameters -q20 and -p50. Reads  
402 containing "N" were discarded. Quality-filtered libraries were aligned on the Arabidopsis  
403 Col-0 genome with the Araport11 annotation using the default settings of CLC Genomic  
404 Workbench 20. Transcription levels for each transcript were calculated as TPM (transcripts  
405 per million). Differential expression was analyzed using the R statistical language version  
406 4.1.1 with edgeR version 3.34.0 (Robinson et al., 2010), part of the Bioconductor package  
407 (Gentleman et al., 2004). GO analysis of the 54 confident candidate *DMR6*-coexpressed  
408 genes shown in Table 1 used PANTHER (Mi et al., 2019) at The Arabidopsis Information  
409 Resource (TAIR) website ([https://www.arabidopsis.org/tools/go\\_term\\_enrichment.jsp](https://www.arabidopsis.org/tools/go_term_enrichment.jsp)).

410

### 411 **GUS staining**

412 GUS activity was assayed histochemically with 5-bromo-4-chloro-3-indolyl-β-D-glucuronic  
413 acid (1 mg/mL or 0.2 mg/mL) in a buffer containing 100 mM sodium phosphate pH 7.0, 0.5

414 mM potassium ferrocyanide, 0.5 mM potassium ferricyanide, 10 mM EDTA, 0.1% (v/v)  
415 Triton. Arabidopsis leaves were vacuum infiltrated with staining solution and then incubated  
416 overnight at 37 °C in the dark. Samples were destained in absolute ethanol followed by  
417 incubation in a chloral hydrate solution. Stained leaves were observed using an Olympus  
418 BX51 microscope.

419

## 420 **Figure Legends**

421 **Figure 1 | Schematic diagram of a new translating ribosome affinity purification**  
422 **(TRAP) system. (A)** Schematic view of cell-specific responses in the *H. arabidopsidis*-  
423 *Arabidopsis* interaction. *H. arabidopsidis* extends hyphae to form haustoria inside host cells  
424 (yellow shapes). Red-shaded cells indicate cells in which the *DMR6* promoter (*pDMR6*) is  
425 activated, i.e., the haustoriated (infected) cells. Blue-shaded cells indicate cells in which the  
426 *PR1* promoter (*pPR1*) is activated, i.e., the non-haustoriated adjacent (non-infected) cells. **(B)**  
427 Schematic representation of two chimeric constructs; Im9-RPL18 fused to the *35S* promoter  
428 (*p35S*) and E9-HF controlled by *pDMR6*, *pPR1*, or the *Actin2* promoter (*pAct2*). HF, a  
429 tandem 6xHis and 3xFLAG epitope tag. **(C)** Schematic diagram of ribosomal complexes in  
430 cells where the promoters fused to E9-HF are unactivated (upper panel) or activated (lower  
431 panel).

432

433 **Figure 2 | Formation of ribosomal complexes consisting of chimeric constructs**  
434 **coincident with E9 and Im9 binding.** Subcellular localization of YFP-RPL18 and E9-GFP  
435 when coexpressed with GUS and Im9-RPL18. The indicated constructs were transiently  
436 expressed in *N. benthamiana* leaves. The left image is the bright-field (BF) image, the middle  
437 image is from the GFP/YFP channel, and the right image is the overlay of the BF image and  
438 GFP channel. Dashed white circles mark the locations of nuclei in the BF pictures. Scale bars,  
439 10 µm.

440

441 **Figure 3 | Validating the enrichment of specific cell-derived mRNAs during *H.***  
442 ***arabidopsidis* infection by the new TRAP system. (A)** Flowchart of the steps used to  
443 validate the cell-specific TRAP system. Protein accumulation **(B)** and expression of *DMR6*  
444 **(C)**, *PR1* **(D)**, and *Act2* **(E)** in Arabidopsis Col-0 transgenic lines containing *pDMR6::E9-HF*  
445 (*pDMR6*), *pPR1::E9-HF* (*pPR1*) or *pAct2::E9-HF* (*pAct2*) and *p35S::Im9-RPL18*. **(B)** Total  
446 proteins were prepared from 3-week-old plants at 5 d after spraying water (N) or inoculation  
447 with *H. arabidopsidis* (I). An immunoblot analyzed using anti-FLAG (upper panel)

448 antibodies. Protein loads were monitored by Coomassie Brilliant Blue (CBB) staining of  
449 bands corresponding to ribulose-1,5-bisphosphate carboxylase (Rubisco) large subunit (lower  
450 panel). (C-E) The expression levels of *DMR6*, *PR1*, and *Act2* in the RNAs\_Total and  
451 RNAs\_IP samples were determined by RT-qPCR. Data are means  $\pm$  SDs from three  
452 biological replicates.

453

454 **Figure 4 | Selecting confident candidate *DMR6*-coexpressed genes.** (A) The number of  
455 genes significantly upregulated (UP) or downregulated (DOWN) among Arabidopsis Col-0  
456 transgenic lines containing *pDMR6::E9-HF* (pDMR6), *pPR1::E9-HF* (pPR1), or  
457 *pAct2::E9-HF* (pAct2) and *p35S::Im9-RLP18*. (B) Assessment of overlapping differentially  
458 expressed genes to select confident candidate *DMR6*-coexpressed genes. The comparison of  
459 upregulated genes between pDMR6 and pPR1 transformants in the RNAs\_IP samples  
460 revealed 1,571 genes as *DMR6*-coexpressed candidate genes (pDMR6-specific UP).  
461 Comparing the 1,571 genes with 875 genes significantly upregulated at 5 d after inoculation  
462 (dpi) with *H. arabidopsidis* reported by Asai et al. (2014) revealed that 54 genes overlapped  
463 in the two conditions. The figures on the right indicate proposed expression sites: red-shaded  
464 cells, expression sites where *DMR6*-coexpressed genes are expressed; blue-shaded cells,  
465 expression sites where *PR1*-coexpressed genes are expressed.

466

467 **Figure 5 | Cellular expression patterns of *DMR6*-coexpressed genes.** GUS staining of  
468 3-week-old Arabidopsis leaves containing the indicated gene promoter fused to a *GUS*  
469 reporter gene after inoculating leaves with *H. arabidopsidis* Waco9 and water as a control  
470 (Mock). A GUS staining solution containing one-fifth the amount of substrate was used to  
471 monitor expression in the infected leaves due to high promoter activity in response to *H.*  
472 *arabidopsidis* infection. The images in the lower panel are magnifications of the middle  
473 images. Red asterisks indicate locations where *H. arabidopsidis* haustoria formed in leaf  
474 mesophyll cells. Scale bars = 40  $\mu$ m.

475

476 **Figure 6 | Disease resistance phenotypes of transgenic plants expressing**  
477 ***DMR6*-coexpressed genes.** *H. arabidopsidis* (upper panel) and *P. syringae* pv. *tomato* (*Pto*)  
478 DC3000 (lower panel) growth on two independent transgenic lines expressing the indicated  
479 genes. Data are shown relative to the Arabidopsis Col-0 WT value of 100. Data are means  $\pm$   
480 SEs from five and four biological replicates for *H. arabidopsidis* and *Pto* DC3000 growth,  
481 respectively, and represent three independent results. Data were analyzed by Student's *t*-test:

482 \*,  $p < 0.05$ ; \*\*,  $p < 0.01$  vs Col-0 WT plants.

483

#### 484 **Supplemental data**

485 The following materials are available in the online version of this article.

486 **Supplemental Figure S1. Schematic diagram of the traditional translating ribosome**  
487 **affinity purification (TRAP) system.** (A) A schematic representation of the chimeric  
488 construct; an epitope-tagged ribosomal protein L18 (RPL18) fused to a constitutive promoter  
489 or a promoter that is active in a specific cell type (cell-type promoter). (B) Schematic diagram  
490 of ribosomal complexes in cells where the promoters fused to an epitope-tagged RPL18 are  
491 unactivated or activated.

492

493 **Supplemental Figure S2. Expression levels of *DMR6* and *PRI* in samples derived from**  
494 **whole tissues during *H. arabidopsidis* infection.** Expression levels of *DMR6* (A) and *PRI*  
495 (B) at 1, 3, and 5 d post inoculation (dpi) with *H. arabidopsidis* Waco9 isolate or water as a  
496 control (Mock) are represented as TPM (tags per million) of total reads aligned to the  
497 Arabidopsis genome. The data are derived from RNA seq data from Asai et al. 2014.

498

499 **Supplemental Figure S3. Enriched gene ontology (GO) terms of *DMR6*-coexpressed**  
500 **genes.** GO enrichment analysis of *DMR6* and 53 *DMR6*-coexpressed genes. Fold enrichment  
501 ( $p < 0.05$ ) was determined by query gene number divided by the expected gene number for  
502 each GO term.

503

504 **Supplemental Figure S4. Morphology of transgenic plants overexpressing**  
505 ***DMR6*-coexpressed genes.** (A) Confirmation of protein accumulation in Arabidopsis Col-0  
506 transgenic lines overexpressing *AT1G09932*, *PCR2*, *KTI4*, *AZI3*, and *GLP9*. Total proteins  
507 were prepared from 6-week-old plants. Immunoblotted proteins were treated with anti-FLAG  
508 (upper panel) antibodies. Protein loads were monitored by Coomassie Brilliant Blue (CBB)  
509 staining of the bands corresponding to ribulose-1,5-bisphosphate carboxylase (Rubisco) large  
510 subunit (lower panel). (B) Morphology of Arabidopsis Col-0 WT and transgenic lines  
511 photographed at 6-weeks.

512

513 **Supplemental Figure S5. Expression levels of *AZII*, *EARLII*, *AZI3*, and *AZI4* in the**  
514 **TRAP samples.** Expression of *AZII* (*AT4G12470*), *EARLII* (*AT4G12480*), *AZI3*  
515 (*AT4G12490*) and *AZI4* (*AT4G12500*) in the Arabidopsis Col-0 transgenic lines containing



516 *pDMR6::E9-HF* (pDMR6), *pPR1::E9-HF* (pPR1) or *pAct2::E9-HF* (pAct2) and  
517 *p35S::Im9-RLP18*. The expression level of *AZII*, *EARLII*, *AZI3*, and *AZI4* in the RNAs\_Total  
518 and RNAs\_IP samples are represented as TPM (transcripts per million) of total reads aligned  
519 to the Arabidopsis genome. Data are means  $\pm$  SDs from three biological replicates.

520

521 **Supplemental Figure S6. Disease resistance phenotypes of *kti4.1* to *H. arabidopsidis***  
522 **inoculation.** *H. arabidopsidis* growth (conidiospore number) on the *kti4.1* mutant. Data are  
523 shown relative to the Arabidopsis Col-0 WT value of 100. Data are means  $\pm$  SEs from five  
524 biological replicates and represent three independent results.

525

526 **Supplemental Figure S7. Expression levels of *KTI4* and its paralogs in the TRAP**  
527 **samples.** Expression of *KTI4* and its paralogs in the Arabidopsis Col-0 transgenic lines  
528 containing *pDMR6::E9-HF* (pDMR6), *pPR1::E9-HF* (pPR1) or *pAct2::E9-HF* (pAct2) and  
529 *p35S::Im9-RLP18*. The expression level of *KTI4* and its paralogs in RNAs\_Total and  
530 RNAs\_IP samples are represented as TPM (transcripts per million) of total reads aligned to  
531 the Arabidopsis genome. Data are means  $\pm$  SDs from three biological replicates. ND, not  
532 detectable.

533

534 **Supplemental Table S1. The expression patterns of Arabidopsis genes in the TRAP**  
535 **samples after inoculation with *H. arabidopsidis* Waco9.**

536

537 **Supplemental Table S2. Genes with significantly different expression levels.**

538

539 **Supplemental Table S3. Gene accession numbers for differentially expressed candidate**  
540 **genes.**

541

542 **Supplemental Table S4. Primers used in this study.**

543

#### 544 **Acknowledgments**

545 We thank Dr. Sylvestre Marillonnet for Golden Gate vectors and Prof Colin Kleanthous (U  
546 Oxford) for helpful discussion about the E9/Im9 system and for providing E9 and Im9 clones.

547 We are grateful to Ryo Yoshida for providing the illustrations. We also thank Takuya Okubo,  
548 Soshi Tsuchiya, Asuka Yoshida, Kota Hidaka, Manami Yamazaki, Ippei Takahashi, Eri Kurai,  
549 Emika Okubo, and Kaoru Yoshida for their support.

550

551 **Funding**

552 This work was supported by Grant-in-Aid for Scientific Research (KAKENHI) 17K07679  
553 (S.A.), 20H02995 (S.A.), JP20H05909 (K.S.), and JP22H00364 (K.S.) and by funding to TSL  
554 from the Gatsby Foundation (J.D.G.J).

555

556 **Author Contributions**

557 S.A., V.C., J.D.G.J. and K.S. conceptualized and designed the research. S.A. and V.C.  
558 conducted experiments and data analysis. S.A. and K.S. wrote the manuscript.

559

560

561 **References**

562

563 **Arnaiz A, Talavera-Mateo L, Gonzalez-Melendi P, Martinez M, Diaz I, Santamaria ME**  
564 (2018) Arabidopsis kunitz trypsin inhibitors in defense against spider mites. *Front*  
565 *Plant Sci* **9**: 986

566 **Asai S, Ohta K, Yoshioka H** (2008) MAPK signaling regulates nitric oxide and NADPH  
567 oxidase-dependent oxidative bursts in *Nicotiana benthamiana*. *Plant Cell* **20**:  
568 1390-1406

569 **Asai S, Rallapalli G, Piquerez SJ, Caillaud MC, Furzer OJ, Ishaque N, Wirthmueller L,**  
570 **Fabro G, Shirasu K, Jones JD** (2014) Expression profiling during  
571 Arabidopsis/downy mildew interaction reveals a highly-expressed effector that  
572 attenuates responses to salicylic acid. *PLoS Pathog* **10**: e1004443

573 **Asai S, Shirasu K, Jones JD** (2015) *Hyaloperonospora arabidopsidis* (downy mildew)  
574 infection assay in *Arabidopsis*. *Bio-protocol* **5**: e1627

575 **Birkenbihl RP, Kracher B, Roccaro M, Somssich IE** (2017) Induced genome-wide binding  
576 of three Arabidopsis WRKY transcription factors during early MAMP-triggered  
577 immunity. *Plant Cell* **29**: 20-38

578 **Caillaud MC, Asai S, Rallapalli G, Piquerez SJ, Fabro G, Jones JDG** (2013) A downy  
579 mildew effector attenuates salicylic acid-triggered immunity in Arabidopsis by  
580 interacting with the host mediator complex. *PLoS Biol* **11**: e1001732

581 **Cecchini NM, Steffes K, Schlappi MR, Gifford AN, Greenberg JT** (2015) *Arabidopsis*  
582 AZII family proteins mediate signal mobilization for systemic defence priming. *Nat*  
583 *Commun* **6**: 7658

584 **Clough SJ, Bent AF** (1998) Floral dip: a simplified method for *Agrobacterium*-mediated  
585 transformation of *Arabidopsis thaliana*. *Plant J* **16**: 735-743

586 **Coates ME, Beynon JL** (2010) *Hyaloperonospora Arabidopsidis* as a pathogen model. *Annu*  
587 *Rev Phytopathol* **48**: 329-345

588 **Dinkeloo K, Pelly Z, McDowell JM, Pilot G** (2022) A split green fluorescent protein system  
589 to enhance spatial and temporal sensitivity of translating ribosome affinity  
590 purification. *Plant J* **111**: 304-315

591 **Engler C, Kandzia R, Marillonnet S** (2008) A one pot, one step, precision cloning method  
592 with high throughput capability. *PLoS One* **3**: e3647

593 **Engler C, Youles M, Gruetzner R, Ehnert TM, Werner S, Jones JD, Patron NJ,**  
594 **Marillonnet S** (2014) A golden gate modular cloning toolbox for plants. *ACS Synth*  
595 *Biol* **3**: 839-843

596 **Gentleman RC, Carey VJ, Bates DM, Bolstad B, Dettling M, Dudoit S, Ellis B, Gautier**  
597 **L, Ge Y, Gentry J, Hornik K, Hothorn T, Huber W, Iacus S, Irizarry R, Leisch F,**  
598 **Li C, Maechler M, Rossini AJ, Sawitzki G, Smith C, Smyth G, Tierney L, Yang**  
599 **JY, Zhang J** (2004) Bioconductor: open software development for computational  
600 biology and bioinformatics. *Genome Biol* **5**: R80

601 **Heiman M, Kulicke R, Fenster RJ, Greengard P, Heintz N** (2014) Cell type-specific  
602 mRNA purification by translating ribosome affinity purification (TRAP). *Nat Protoc*  
603 **9**: 1282-1291

604 **Hou S, Tsuda K** (2022) Salicylic acid and jasmonic acid crosstalk in plant immunity. *Essays*  
605 *Biochem* **66**: 647-656

606 **Igarashi D, Tsuda K, Katagiri F** (2012) The peptide growth factor, phytosulfokine,  
607 attenuates pattern-triggered immunity. *Plant J* **71**: 194-204

608 **Jung HW, Tschaplinski TJ, Wang L, Glazebrook J, Greenberg JT** (2009) Priming in  
609 systemic plant immunity. *Science* **324**: 89-91

610 **Li J, Brader G, Palva ET** (2008) Kunitz trypsin inhibitor: an antagonist of cell death

- 611 triggered by phytopathogens and fumonisin b1 in *Arabidopsis*. *Mol Plant* **1**: 482-495
- 612 **Li W, Dennis CA, Moore GR, James R, Kleanthous C** (1997) Protein-protein interaction  
613 specificity of Im9 for the endonuclease toxin colicin E9 defined by  
614 homologue-scanning mutagenesis. *J Biol Chem* **272**: 22253-22258
- 615 **Mi H, Muruganujan A, Ebert D, Huang X, Thomas PD** (2019) PANTHER version 14:  
616 more genomes, a new PANTHER GO-slim and improvements in enrichment analysis  
617 tools. *Nucleic Acids Res* **47**: D419-D426
- 618 **Mosher S, Seybold H, Rodriguez P, Stahl M, Davies KA, Dayaratne S, Morillo SA,**  
619 **Wierzba M, Favery B, Keller H, Tax FE, Kemmerling B** (2013) The  
620 tyrosine-sulfated peptide receptors PSKR1 and PSY1R modify the immunity of  
621 *Arabidopsis* to biotrophic and necrotrophic pathogens in an antagonistic manner. *Plant*  
622 *J* **73**: 469-482
- 623 **Mustroph A, Juntawong P, Bailey-Serres J** (2009a) Isolation of plant polysomal mRNA by  
624 differential centrifugation and ribosome immunopurification methods. *Methods Mol*  
625 *Biol* **553**: 109-126
- 626 **Mustroph A, Zanetti ME, Jang CJ, Holtan HE, Repetti PP, Galbraith DW, Girke T,**  
627 **Bailey-Serres J** (2009b) Profiling translomes of discrete cell populations resolves  
628 altered cellular priorities during hypoxia in *Arabidopsis*. *Proc Natl Acad Sci U S A*  
629 **106**: 18843-18848
- 630 **Pandey SP, Roccaro M, Schon M, Logemann E, Somssich IE** (2010) Transcriptional  
631 reprogramming regulated by WRKY18 and WRKY40 facilitates powdery mildew  
632 infection of *Arabidopsis*. *Plant J* **64**: 912-923
- 633 **Rallapalli G, Kemen EM, Robert-Seilaniantz A, Segonzac C, Etherington GJ, Sohn KH,**  
634 **MacLean D, Jones JD** (2014) EXPRSS: an Illumina based high-throughput  
635 expression-profiling method to reveal transcriptional dynamics. *BMC Genomics* **15**:  
636 341
- 637 **Robinson MD, McCarthy DJ, Smyth GK** (2010) edgeR: a Bioconductor package for  
638 differential expression analysis of digital gene expression data. *Bioinformatics* **26**:  
639 139-140
- 640 **van Damme M, Huibers RP, Elberse J, Van den Ackerveken G** (2008) *Arabidopsis* *DMR6*  
641 encodes a putative 2OG-Fe(II) oxygenase that is defense-associated but required for  
642 susceptibility to downy mildew. *Plant J* **54**: 785-793
- 643 **van Schie CC, Takken FL** (2014) Susceptibility genes 101: how to be a good host. *Annu*  
644 *Rev Phytopathol* **52**: 551-581
- 645 **Wang XY, Li DZ, Li Q, Ma YQ, Yao JW, Huang X, Xu ZQ** (2016) Metabolomic analysis  
646 reveals the relationship between *AZII* and sugar signaling in systemic acquired  
647 resistance of *Arabidopsis*. *Plant Physiol Biochem* **107**: 273-287
- 648 **Wirthmueller L, Asai S, Rallapalli G, Sklenar J, Fabro G, Kim DS, Lintermann R,**  
649 **Jaspers P, Wrzaczek M, Kangasjaervi J, MacLean D, Menke FLH, Banfield MJ,**  
650 **Jones JDG** (2018) *Arabidopsis* downy mildew effector HaRXL106 suppresses plant  
651 immunity by binding to RADICAL-INDUCED CELL DEATH1. *New Phytologist*  
652 **220**: 232-248
- 653 **Xu X, Chen C, Fan B, Chen Z** (2006) Physical and functional interactions between  
654 pathogen-induced *Arabidopsis* WRKY18, WRKY40, and WRKY60 transcription  
655 factors. *Plant Cell* **18**: 1310-1326
- 656 **Zhang Y, Zhao L, Zhao J, Li Y, Wang J, Guo R, Gan S, Liu CJ, Zhang K** (2017)  
657 *S5H/DMR6* Encodes a Salicylic Acid 5-Hydroxylase That Fine-Tunes Salicylic Acid  
658 Homeostasis. *Plant Physiol* **175**: 1082-1093
- 659 **Zoeller M, Stingl N, Krischke M, Fekete A, Waller F, Berger S, Mueller MJ** (2012) Lipid  
660 profiling of the *Arabidopsis* hypersensitive response reveals specific lipid

661 peroxidation and fragmentation processes: biogenesis of pimelic and azelaic acid.  
662 Plant Physiol **160**: 365-378  
663

**Table 1** | The list and expression patterns of *DMR6* and 53 *DMR6*-coexpressed genes.

| AGI ID <sup>a</sup> | Name           | RNAs_IP            |                   |                    | RNAs_Total         |                   |                    |
|---------------------|----------------|--------------------|-------------------|--------------------|--------------------|-------------------|--------------------|
|                     |                | pDMR6 <sup>b</sup> | pPR1 <sup>b</sup> | pAct2 <sup>b</sup> | pDMR6 <sup>b</sup> | pPR1 <sup>b</sup> | pAct2 <sup>b</sup> |
| AT1G02920           | GSTF7, GST11   | 6730.1             | 3937.5            | 3486.3             | 2926.6             | 2604.7            | 2279.0             |
| AT1G02930           | GSTF6, GST1    | 10346.6            | 5948.0            | 6299.9             | 4218.3             | 3778.1            | 3295.7             |
| AT1G05340           | HCYSTM1        | 1078.1             | 351.8             | 402.4              | 127.8              | 117.5             | 97.7               |
| AT1G08310           |                | 9.1                | 2.2               | 0                  | 0.9                | 2.0               | 2.9                |
| AT1G08860           | BON3           | 6.8                | 0                 | 0                  | 1.1                | 3.6               | 3.4                |
| AT1G09080           | BIP3, HSP70-13 | 4.9                | 1.9               | 0                  | 4.8                | 8.1               | 5.7                |
| AT1G09932           |                | 2023.8             | 822.4             | 938.7              | 667.8              | 589.9             | 560.5              |
| AT1G14870           | PCR2           | 1678.5             | 1121.3            | 855.4              | 390.2              | 358.5             | 283.5              |
| AT1G15010           |                | 416.7              | 159.5             | 79.1               | 45.7               | 53.6              | 51.8               |
| AT1G21400           | E1A1           | 128.6              | 79.5              | 14.1               | 91.5               | 65.8              | 60.9               |
| AT1G34420           |                | 31.7               | 1.1               | 0                  | 14.5               | 10.8              | 12.1               |
| AT1G56060           | HCYSTM3        | 271.1              | 210.3             | 96.8               | 29.0               | 48.4              | 57.4               |
| AT1G65240           | A39            | 17.3               | 5.3               | 0                  | 1.7                | 3.0               | 1.1                |
| AT1G65845           |                | 448.3              | 345.2             | 218.4              | 187.5              | 171.6             | 153.0              |
| AT1G70170           | MMP            | 22.4               | 3.4               | 0                  | 7.2                | 7.7               | 6.9                |
| AT1G73260           | KTI1, KTI4     | 1120.0             | 626.5             | 352.9              | 319.5              | 297.2             | 220.9              |
| AT1G73810           |                | 18.9               | 16.7              | 1.9                | 24.1               | 20.4              | 20.2               |
| AT1G78190           | TRM112A        | 7.6                | 1.4               | 0                  | 1.1                | 0.5               | 3.9                |
| AT2G27389           |                | 104.3              | 13.8              | 6.5                | 10.0               | 15.6              | 11.7               |
| AT2G28710           |                | 10.2               | 3.0               | 0                  | 2.3                | 1.0               | 0.3                |
| AT2G38870           |                | 1134.0             | 753.1             | 429.9              | 259.5              | 233.0             | 196.4              |
| AT2G39518           | CASPL4D2       | 1391.8             | 757.2             | 608.3              | 495.7              | 441.6             | 322.5              |
| AT2G41905           |                | 37.8               | 7.5               | 1.9                | 15.8               | 16.5              | 18.6               |
| AT3G02040           | GDPD1, SRG3    | 94.3               | 55.7              | 5.1                | 41.2               | 37.2              | 45.6               |
| AT3G11080           | RLP35          | 12.5               | 2.6               | 0                  | 5.0                | 5.0               | 5.9                |
| AT3G48630           |                | 10.8               | 0.6               | 0                  | 6.0                | 9.5               | 4.7                |
| AT3G49780           | PSK4           | 1056.8             | 498.8             | 192.1              | 185.9              | 165.5             | 109.6              |
| AT3G50470           | HR3, MLA10     | 113.2              | 23.6              | 3.7                | 40.1               | 32.5              | 24.7               |
| AT3G52400           | SYP122         | 565.8              | 404.7             | 209.1              | 127.6              | 140.3             | 152.2              |
| AT3G57380           |                | 12.5               | 7.5               | 0                  | 1.8                | 1.2               | 0.8                |
| AT3G61390           | PUB36          | 103.0              | 48.0              | 18.4               | 36.7               | 37.4              | 37.0               |
| AT4G08780           |                | 17.7               | 1.5               | 0                  | 5.8                | 14.2              | 11.6               |
| AT4G11910           | NYE2, SGR2     | 12.4               | 2.9               | 0                  | 7.8                | 6.3               | 4.1                |
| AT4G12480           | EARL11         | 2553.4             | 1141.6            | 1240.8             | 852.6              | 731.3             | 681.1              |
| AT4G12490           | AZI3           | 3325.1             | 1944.6            | 1311.6             | 1553.7             | 1357.8            | 1192.1             |
| AT4G14630           | GLP9           | 622.3              | 253.3             | 156.4              | 147.8              | 160.4             | 132.9              |
| AT4G15270           |                | 7.0                | 0.5               | 0                  | 2.6                | 1.8               | 2.4                |
| AT4G15610           | CASPL1D1       | 1068.2             | 587.3             | 487.4              | 319.3              | 283.4             | 208.1              |
| AT4G31800           | WRKY18         | 547.1              | 383.0             | 264.9              | 245.4              | 255.7             | 202.3              |
| AT4G34380           |                | 9.8                | 0.5               | 0                  | 1.3                | 5.0               | 2.8                |
| AT5G08380           | AGAL1          | 43.3               | 20.0              | 3.7                | 33.3               | 30.7              | 36.4               |
| AT5G13190           | GILP           | 792.8              | 653.9             | 377.5              | 180.4              | 192.6             | 193.6              |
| AT5G18470           |                | 83.0               | 76.5              | 11.2               | 66.3               | 94.2              | 71.0               |
| AT5G20230           | SAG14          | 2035.2             | 1195.4            | 817.8              | 358.6              | 643.3             | 524.0              |
| AT5G24530           | DMR6           | 699.2              | 471.9             | 322.6              | 357.2              | 327.1             | 278.3              |
| AT5G26920           | CBP60G         | 485.7              | 259.5             | 196.3              | 129.9              | 172.9             | 136.3              |
| AT5G42300           | UBL5           | 1178.7             | 940.2             | 775.1              | 454.0              | 478.4             | 441.3              |
| AT5G50200           | NRT3.1, WR3    | 135.0              | 113.5             | 30.9               | 67.6               | 68.3              | 71.3               |
| AT5G54140           | ILL1           | 15.2               | 2.5               | 0                  | 7.2                | 10.7              | 9.3                |
| AT5G55470           | NHX2           | 3.4                | 0.3               | 0                  | 3.2                | 3.1               | 4.0                |
| AT5G55560           |                | 35.9               | 12.7              | 1.9                | 14.7               | 8.7               | 11.0               |
| AT5G56970           | CKX3           | 13.1               | 1.8               | 0                  | 3.1                | 8.2               | 5.1                |
| AT5G57010           |                | 15.7               | 0.6               | 0                  | 4.6                | 9.2               | 3.1                |
| AT5G64120           | PRX71          | 2630.0             | 807.5             | 812.9              | 1244.2             | 940.8             | 678.3              |

<sup>a</sup>Arabidopsis genome initiative number.

<sup>b</sup>Expression levels are represented as the mean value of TPM (transcripts per million) of total reads aligned to Arabidopsis genome. "0" indicates no sequence read aligned.

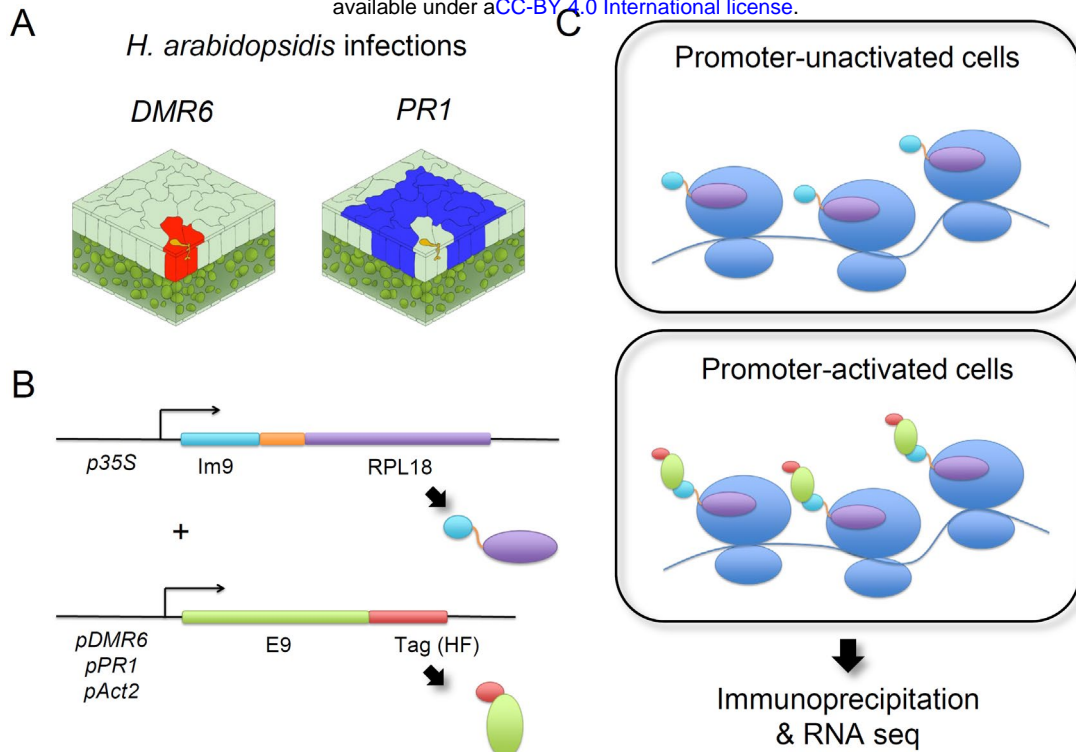

**Figure 1 | Schematic diagram of a new translating ribosome affinity purification (TRAP) system. (A)** Schematic view of cell-specific responses in the *H. arabidopsidis*–*Arabidopsis* interaction. *H. arabidopsidis* extends hyphae to form haustoria inside host cells (yellow shapes). Red-shaded cells indicate cells in which the *DMR6* promoter (*pDMR6*) is activated, i.e., the haustoriated (infected) cells. Blue-shaded cells indicate cells in which the *PR1* promoter (*pPR1*) is activated, i.e., the non-haustoriated adjacent (non-infected) cells. **(B)** Schematic representation of two chimeric constructs; Im9-RPL18 fused to the *35S* promoter (*p35S*) and E9-HF controlled by *pDMR6*, *pPR1*, or the *Actin2* promoter (*pAct2*). HF, a tandem 6xHis and 3xFLAG epitope tag. **(C)** Schematic diagram of ribosomal complexes in cells where the promoters fused to E9-HF are unactivated (upper panel) or activated (lower panel).

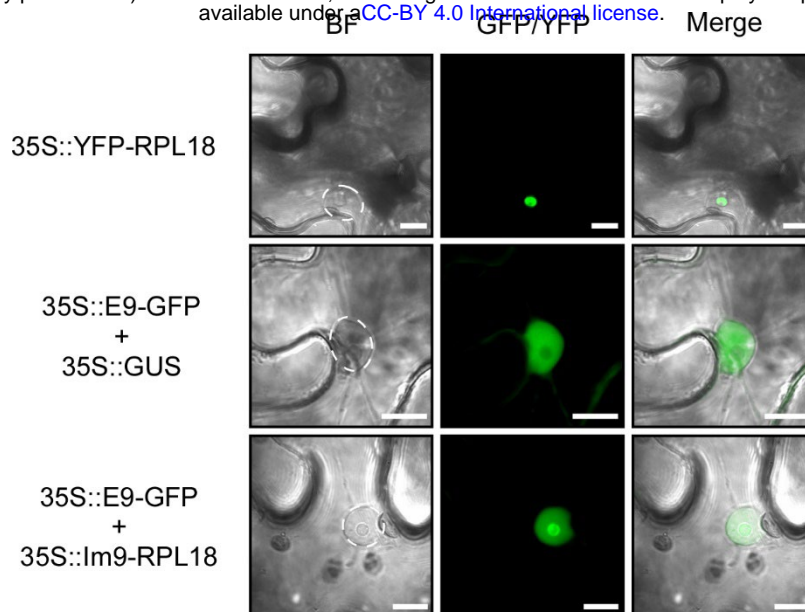

**Figure 2 | Formation of ribosomal complexes consisting of chimeric constructs coincident with E9 and Im9 binding.** Subcellular localization of YFP-RPL18 and E9-GFP when coexpressed with GUS and Im9-RPL18. The indicated constructs were transiently expressed in *N. benthamiana* leaves. The left image is the bright-field (BF) image, the middle image is from the GFP/YFP channel, and the right image is the overlay of the BF image and GFP channel. Dashed white circles mark the locations of nuclei in the BF pictures. Scale bars, 10  $\mu$ m.



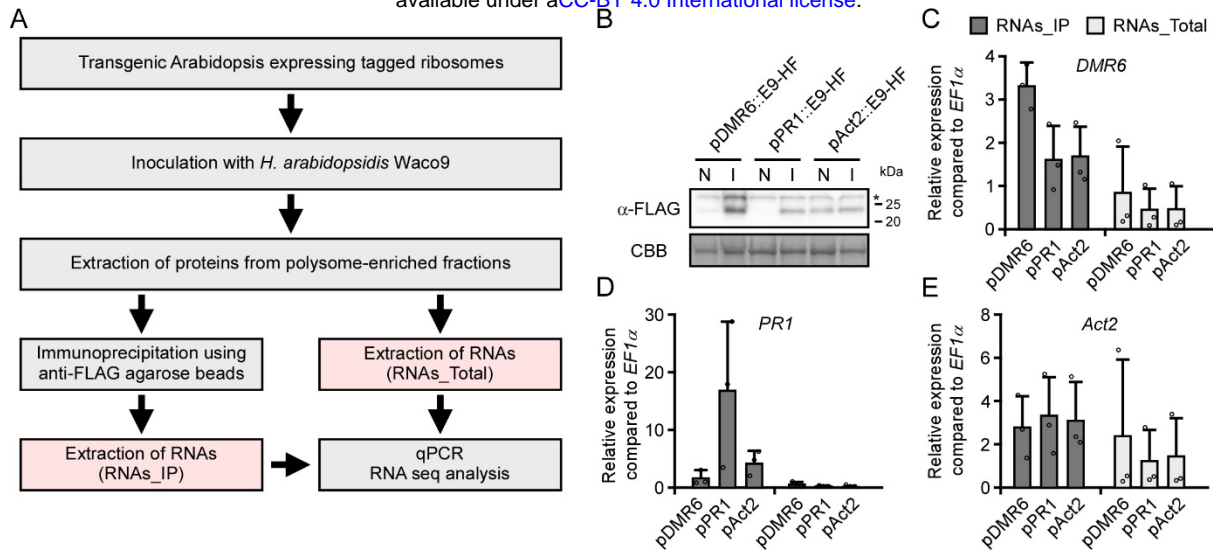

**Figure 3 | Validating the enrichment of specific cell-derived mRNAs during *H. arabidopsidis* infection by the new TRAP system.** (A) Flowchart of the steps used to validate the cell-specific TRAP system. Protein accumulation (B) and expression of *DMR6* (C), *PR1* (D), and *Act2* (E) in Arabidopsis Col-0 transgenic lines containing *pDMR6::E9-HF* (pDMR6), *pPR1::E9-HF* (pPR1) or *pAct2::E9-HF* (pAct2) and *p35S::Im9-RLP18*. (B) Total proteins were prepared from 3-week-old plants at 5 d after spraying water (N) or inoculation with *H. arabidopsidis* (I). An immunoblot analyzed using anti-FLAG (upper panel) antibodies. Protein loads were monitored by Coomassie Brilliant Blue (CBB) staining of bands corresponding to ribulose-1,5-bisphosphate carboxylase (Rubisco) large subunit (lower panel). The asterisk indicates a non-specific protein. (C-E) The expression levels of *DMR6*, *PR1*, and *Act2* in the RNAs\_Total and RNAs\_IP samples were determined by RT-qPCR. Data are means  $\pm$  SDs from three biological replicates.

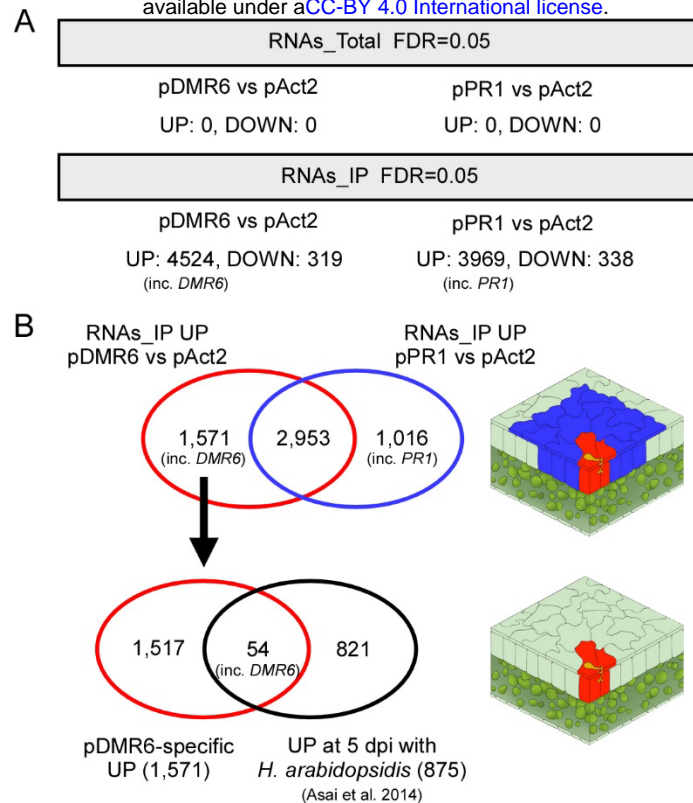

**Figure 4 | Selecting confident candidate *DMR6*-coexpressed genes.** (A) The number of genes significantly upregulated (UP) or downregulated (DOWN) among Arabidopsis Col-0 transgenic lines containing *pDMR6::E9-HF* (pDMR6), *pPR1::E9-HF* (pPR1), or *pAct2::E9-HF* (pAct2) and *p35S::Im9-RLP18*. (B) Assessment of overlapping differentially expressed genes to select confident candidate *DMR6*-coexpressed genes. The comparison of upregulated genes between pDMR6 and pPR1 transformants in the RNAs\_IP samples revealed 1,571 genes as *DMR6*-coexpressed candidate genes (pDMR6-specific UP). Comparing the 1,571 genes with 875 genes significantly upregulated at 5 d after inoculation (dpi) with *H. arabidopsidis* reported by Asai et al. (2014) revealed that 54 genes overlapped in the two conditions. The figures on the right indicate proposed expression sites: red-shaded cells, expression sites where *DMR6*-coexpressed genes are expressed; blue-shaded cells, expression sites where *PR1*-coexpressed genes are expressed.

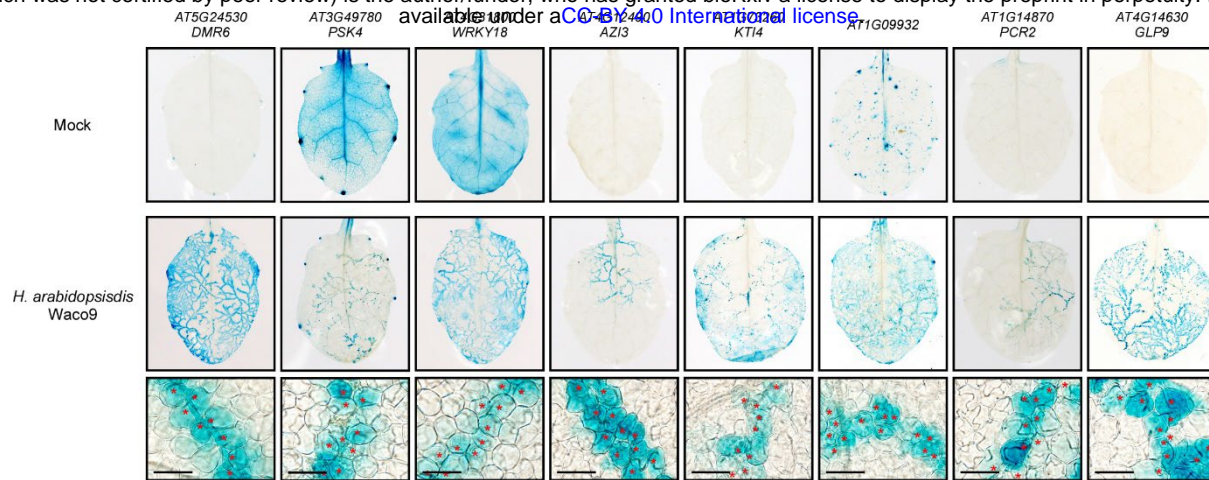

**Figure 5 | Cellular expression patterns of *DMR6*-coexpressed genes.** GUS staining of 3-week-old Arabidopsis leaves containing the indicated gene promoter fused to a *GUS* reporter gene after inoculating leaves with *H. arabidopsidis* Waco9 and water as a control (Mock). A GUS staining solution containing one-fifth the amount of substrate was used to monitor expression in the infected leaves due to high promoter activity in response to *H. arabidopsidis* infection. The images in the lower panel are magnifications of the middle images. Red asterisks indicate locations where *H. arabidopsidis* haustoria formed in leaf mesophyll cells. Scale bars = 40  $\mu$ m.

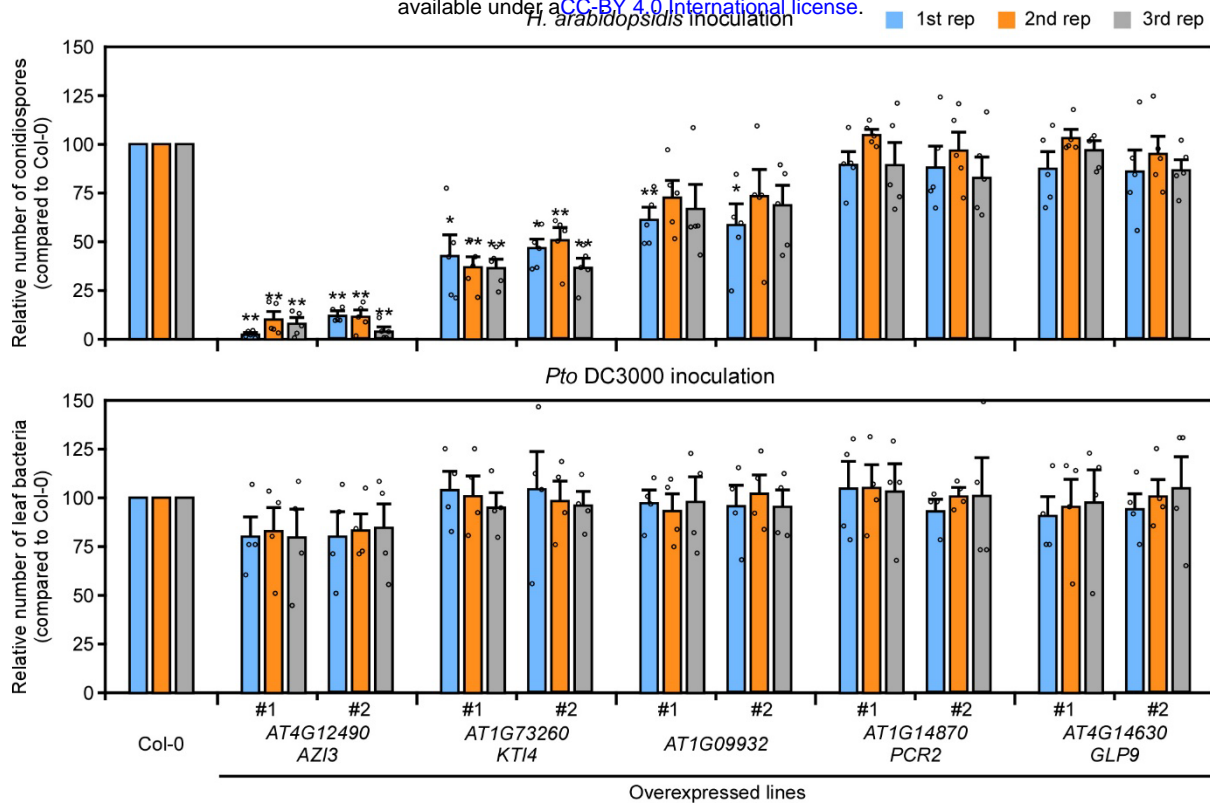

**Figure 6 | Disease resistance phenotypes of transgenic plants expressing *DMR6*-coexpressed genes.** *H. arabidopsidis* (upper panel) and *P. syringae* pv. *tomato* (*Pto*) DC3000 (lower panel) growth on two independent transgenic lines expressing the indicated genes. Data are shown relative to the Arabidopsis Col-0 WT value of 100. Data are means  $\pm$  SEs from five and four biological replicates for *H. arabidopsidis* and *Pto* DC3000 growth, respectively, and represent three independent results. Data were analyzed by Student's *t*-test: \*,  $p < 0.05$ ; \*\*,  $p < 0.01$  vs Col-0 WT plants.

## Parsed Citations

- Arnaiz A, Talavera-Mateo L, Gonzalez-Melendi P, Martinez M, Diaz I, Santamaria ME (2018) Arabidopsis kunitz trypsin inhibitors in defense against spider mites. Front Plant Sci 9: 986**  
Google Scholar: [Author Only](#) [Title Only](#) [Author and Title](#)
- Asai S, Ohta K, Yoshioka H (2008) MAPK signaling regulates nitric oxide and NADPH oxidase-dependent oxidative bursts in Nicotiana benthamiana. Plant Cell 20: 1390-1406**  
Google Scholar: [Author Only](#) [Title Only](#) [Author and Title](#)
- Asai S, Rallapalli G, Piquerez SJ, Caillaud MC, Furzer OJ, Ishaque N, Wirthmueller L, Fabro G, Shirasu K, Jones JD (2014) Expression profiling during Arabidopsis/downy mildew interaction reveals a highly-expressed effector that attenuates responses to salicylic acid. PLoS Pathog 10: e1004443**  
Google Scholar: [Author Only](#) [Title Only](#) [Author and Title](#)
- Asai S, Shirasu K, Jones JD (2015) Hyaloperonospora arabidopsidis (downy mildew) infection assay in Arabidopsis. Bio-protocol 5: e1627**  
Google Scholar: [Author Only](#) [Title Only](#) [Author and Title](#)
- Birkenbihl RP, Kracher B, Roccaro M, Somssich IE (2017) Induced genome-wide binding of three Arabidopsis WRKY transcription factors during early MAMP-triggered immunity. Plant Cell 29: 20-38**  
Google Scholar: [Author Only](#) [Title Only](#) [Author and Title](#)
- Caillaud MC, Asai S, Rallapalli G, Piquerez SJ, Fabro G, Jones JDG (2013) A downy mildew effector attenuates salicylic acid-triggered immunity in Arabidopsis by interacting with the host mediator complex. PLoS Biol 11: e1001732**  
Google Scholar: [Author Only](#) [Title Only](#) [Author and Title](#)
- Cecchini NM, Steffes K, Schlappi MR, Gifford AN, Greenberg JT (2015) Arabidopsis AZ1 family proteins mediate signal mobilization for systemic defence priming. Nat Commun 6: 7658**  
Google Scholar: [Author Only](#) [Title Only](#) [Author and Title](#)
- Clough SJ, Bent AF (1998) Floral dip: a simplified method for Agrobacterium-mediated transformation of Arabidopsis thaliana. Plant J 16: 735-743**  
Google Scholar: [Author Only](#) [Title Only](#) [Author and Title](#)
- Coates ME, Beynon JL (2010) Hyaloperonospora Arabidopsidis as a pathogen model. Annu Rev Phytopathol 48: 329-345**  
Google Scholar: [Author Only](#) [Title Only](#) [Author and Title](#)
- Dinkeloo K, Pelly Z, McDowell JM, Pilot G (2022) A split green fluorescent protein system to enhance spatial and temporal sensitivity of translating ribosome affinity purification. Plant J 111: 304-315**  
Google Scholar: [Author Only](#) [Title Only](#) [Author and Title](#)
- Engler C, Kandzia R, Marillonnet S (2008) A one pot, one step, precision cloning method with high throughput capability. PLoS One 3: e3647**  
Google Scholar: [Author Only](#) [Title Only](#) [Author and Title](#)
- Engler C, Youles M, Gruetzner R, Ehnert TM, Werner S, Jones JD, Patron NJ, Marillonnet S (2014) A golden gate modular cloning toolbox for plants. ACS Synth Biol 3: 839-843**  
Google Scholar: [Author Only](#) [Title Only](#) [Author and Title](#)
- Gentleman RC, Carey VJ, Bates DM, Bolstad B, Dettling M, Dudoit S, Ellis B, Gautier L, Ge Y, Gentry J, Hornik K, Hothorn T, Huber W, Iacus S, Irizarry R, Leisch F, Li C, Maechler M, Rossini AJ, Sawitzki G, Smith C, Smyth G, Tierney L, Yang JY, Zhang J (2004) Bioconductor: open software development for computational biology and bioinformatics. Genome Biol 5: R80**  
Google Scholar: [Author Only](#) [Title Only](#) [Author and Title](#)
- Heiman M, Kulicke R, Fenster RJ, Greengard P, Heintz N (2014) Cell type-specific mRNA purification by translating ribosome affinity purification (TRAP). Nat Protoc 9: 1282-1291**  
Google Scholar: [Author Only](#) [Title Only](#) [Author and Title](#)
- Hou S, Tsuda K (2022) Salicylic acid and jasmonic acid crosstalk in plant immunity. Essays Biochem 66: 647-656**  
Google Scholar: [Author Only](#) [Title Only](#) [Author and Title](#)
- Igarashi D, Tsuda K, Katagiri F (2012) The peptide growth factor, phytosulfokine, attenuates pattern-triggered immunity. Plant J 71: 194-204**  
Google Scholar: [Author Only](#) [Title Only](#) [Author and Title](#)
- Jung HW, Tschaplinski TJ, Wang L, Glazebrook J, Greenberg JT (2009) Priming in systemic plant immunity. Science 324: 89-91**  
Google Scholar: [Author Only](#) [Title Only](#) [Author and Title](#)
- Li J, Brader G, Palva ET (2008) Kunitz trypsin inhibitor: an antagonist of cell death triggered by phytopathogens and fumonisin b1**

in *Arabidopsis*. *Mol Plant* 1: 482-495

Google Scholar: [Author Only](#) [Title Only](#) [Author and Title](#)

Li W, Dennis CA, Moore GR, James R, Kleanthous C (1997) Protein-protein interaction specificity of Im9 for the endonuclease toxin colicin E9 defined by homologue-scanning mutagenesis. *J Biol Chem* 272: 22253-22258

Google Scholar: [Author Only](#) [Title Only](#) [Author and Title](#)

Mi H, Muruganujan A, Ebert D, Huang X, Thomas PD (2019) PANTHER version 14: more genomes, a new PANTHER GO-slim and improvements in enrichment analysis tools. *Nucleic Acids Res* 47: D419-D426

Google Scholar: [Author Only](#) [Title Only](#) [Author and Title](#)

Mosher S, Seybold H, Rodriguez P, Stahl M, Davies KA, Dayaratne S, Morillo SA, Wierzba M, Favery B, Keller H, Tax FE, Kemmerling B (2013) The tyrosine-sulfated peptide receptors PSKR1 and PSY1R modify the immunity of *Arabidopsis* to biotrophic and necrotrophic pathogens in an antagonistic manner. *Plant J* 73: 469-482

Google Scholar: [Author Only](#) [Title Only](#) [Author and Title](#)

Mustroph A, Juntawong P, Bailey-Serres J (2009a) Isolation of plant polysomal mRNA by differential centrifugation and ribosome immunopurification methods. *Methods Mol Biol* 553: 109-126

Google Scholar: [Author Only](#) [Title Only](#) [Author and Title](#)

Mustroph A, Zanetti ME, Jang CJ, Holtan HE, Repetti PP, Galbraith DW, Girke T, Bailey-Serres J (2009b) Profiling translomes of discrete cell populations resolves altered cellular priorities during hypoxia in *Arabidopsis*. *Proc Natl Acad Sci U S A* 106: 18843-18848

Google Scholar: [Author Only](#) [Title Only](#) [Author and Title](#)

Pandey SP, Roccaro M, Schon M, Logemann E, Somssich IE (2010) Transcriptional reprogramming regulated by WRKY18 and WRKY40 facilitates powdery mildew infection of *Arabidopsis*. *Plant J* 64: 912-923

Google Scholar: [Author Only](#) [Title Only](#) [Author and Title](#)

Rallapalli G, Kemen EM, Robert-Seilaniantz A, Segonzac C, Etherington GJ, Sohn KH, MacLean D, Jones JD (2014) EXPRSS: an Illumina based high-throughput expression-profiling method to reveal transcriptional dynamics. *BMC Genomics* 15: 341

Google Scholar: [Author Only](#) [Title Only](#) [Author and Title](#)

Robinson MD, McCarthy DJ, Smyth GK (2010) edgeR: a Bioconductor package for differential expression analysis of digital gene expression data. *Bioinformatics* 26: 139-140

Google Scholar: [Author Only](#) [Title Only](#) [Author and Title](#)

van Damme M, Huibers RP, Elberse J, Van den Ackerveken G (2008) *Arabidopsis* DMR6 encodes a putative 2OG-Fe(II) oxygenase that is defense-associated but required for susceptibility to downy mildew. *Plant J* 54: 785-793

Google Scholar: [Author Only](#) [Title Only](#) [Author and Title](#)

van Schie CC, Takken FL (2014) Susceptibility genes 101: how to be a good host. *Annu Rev Phytopathol* 52: 551-581

Google Scholar: [Author Only](#) [Title Only](#) [Author and Title](#)

Wang XY, Li DZ, Li Q, Ma YQ, Yao JW, Huang X, Xu ZQ (2016) Metabolomic analysis reveals the relationship between AZ1 and sugar signaling in systemic acquired resistance of *Arabidopsis*. *Plant Physiol Biochem* 107: 273-287

Google Scholar: [Author Only](#) [Title Only](#) [Author and Title](#)

Wirthmueller L, Asai S, Rallapalli G, Sklenar J, Fabro G, Kim DS, Lintermann R, Jaspers P, Wrzaczek M, Kangasjaervi J, MacLean D, Menke FLH, Banfield MJ, Jones JDG (2018) *Arabidopsis* downy mildew effector HaRxL106 suppresses plant immunity by binding to RADICAL-INDUCED CELL DEATH1. *New Phytologist* 220: 232-248

Google Scholar: [Author Only](#) [Title Only](#) [Author and Title](#)

Xu X, Chen C, Fan B, Chen Z (2006) Physical and functional interactions between pathogen-induced *Arabidopsis* WRKY18, WRKY40, and WRKY60 transcription factors. *Plant Cell* 18: 1310-1326

Google Scholar: [Author Only](#) [Title Only](#) [Author and Title](#)

Zhang Y, Zhao L, Zhao J, Li Y, Wang J, Guo R, Gan S, Liu CJ, Zhang K (2017) S5H/DMR6 Encodes a Salicylic Acid 5-Hydroxylase That Fine-Tunes Salicylic Acid Homeostasis. *Plant Physiol* 175: 1082-1093

Google Scholar: [Author Only](#) [Title Only](#) [Author and Title](#)

Zoeller M, Stingl N, Krischke M, Fekete A, Waller F, Berger S, Mueller MJ (2012) Lipid profiling of the *Arabidopsis* hypersensitive response reveals specific lipid peroxidation and fragmentation processes: biogenesis of pimelic and azelaic acid. *Plant Physiol* 160: 365-378

Google Scholar: [Author Only](#) [Title Only](#) [Author and Title](#)
